# Supplementary material
Source: Springer Nature journal article supplement (https://www.springermedizin.de/resource/supplementary/12877_2011_755_MOESM3_ESM.pdf/9440260)

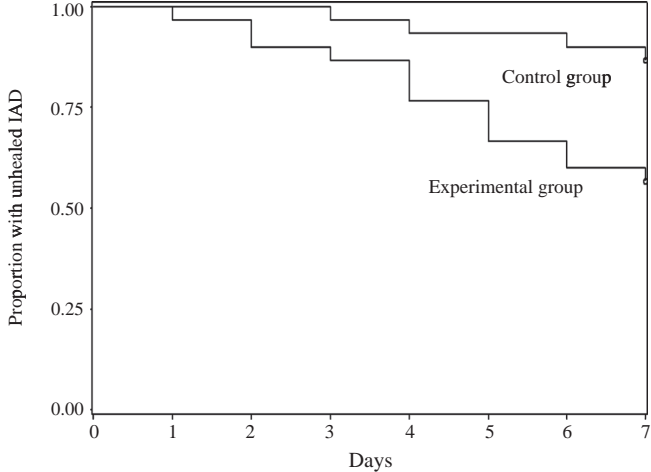

**No. at risk**

Experimental group 30 29 27 26 23 20 18 17

Control group 30 30 30 29 28 28 27 26

Supplement: MOESM3 [file 9440260]
